# Supplementary material for: A Proposed Association between Improving Energy Metabolism of HepG2 Cells by Plant Extracts and Increasing Their Sensitivity to Doxorubicin
Source: MDPI journal article supplement (doi:10.3390/toxics11020182), 2023-02-16
Supplement: s1 [file s1]

---

### **Chromatographic conditions for UPLC/MS analysis**

The chromatographic separation of the asparagus extract followed the method described previously by Jiménez-Sánchez et al. (1). The binary gradient started at 100% A (0.5% formic acid) and 0% B (ACN), followed by a linear gradient of 20 minutes to reach 80% A and 20% B, a 10-minute gradient to 70% A and 30% B, a 10-minute gradient to 50% A and 50% B, and a 20-minute gradient to 0% A and 100% B.

The gradient used for chromatographic separation of the green tea extract was adapted from the method previously published by Savic et al. (2). The multistep gradient consisted of solvent A (0.5% formic acid in water) and solvent B (ACN), starting with 85% A and 15% B for the first 5 minutes, followed by a linear 25-minute gradient to reach 60% A and 40% B, and a further increase of solvent B to reach 5% A and 95% B at 38 minutes, followed by isocratic elution at 95% for 4 additional minutes.

The gradient used for chromatographic separation of the rue extract consisted of solvent A (0.5% formic acid in water) and solvent B (ACN). The multistep gradient started with 90% A and 10% B for the first 5 minutes, followed by a linear gradient to 50% A and 50% B for 25 min; then, an isocratic elution at the same solvent composition was used for an additional 5 min, followed by a linear 6-minute gradient to reach 100% B, which was, in turn, followed by an isocratic linear gradient to reach 100% B and to hold solvent composition for an additional 2 minutes.

**Figure S1.** Structure of major constituents identified in the extract of green asparagus.

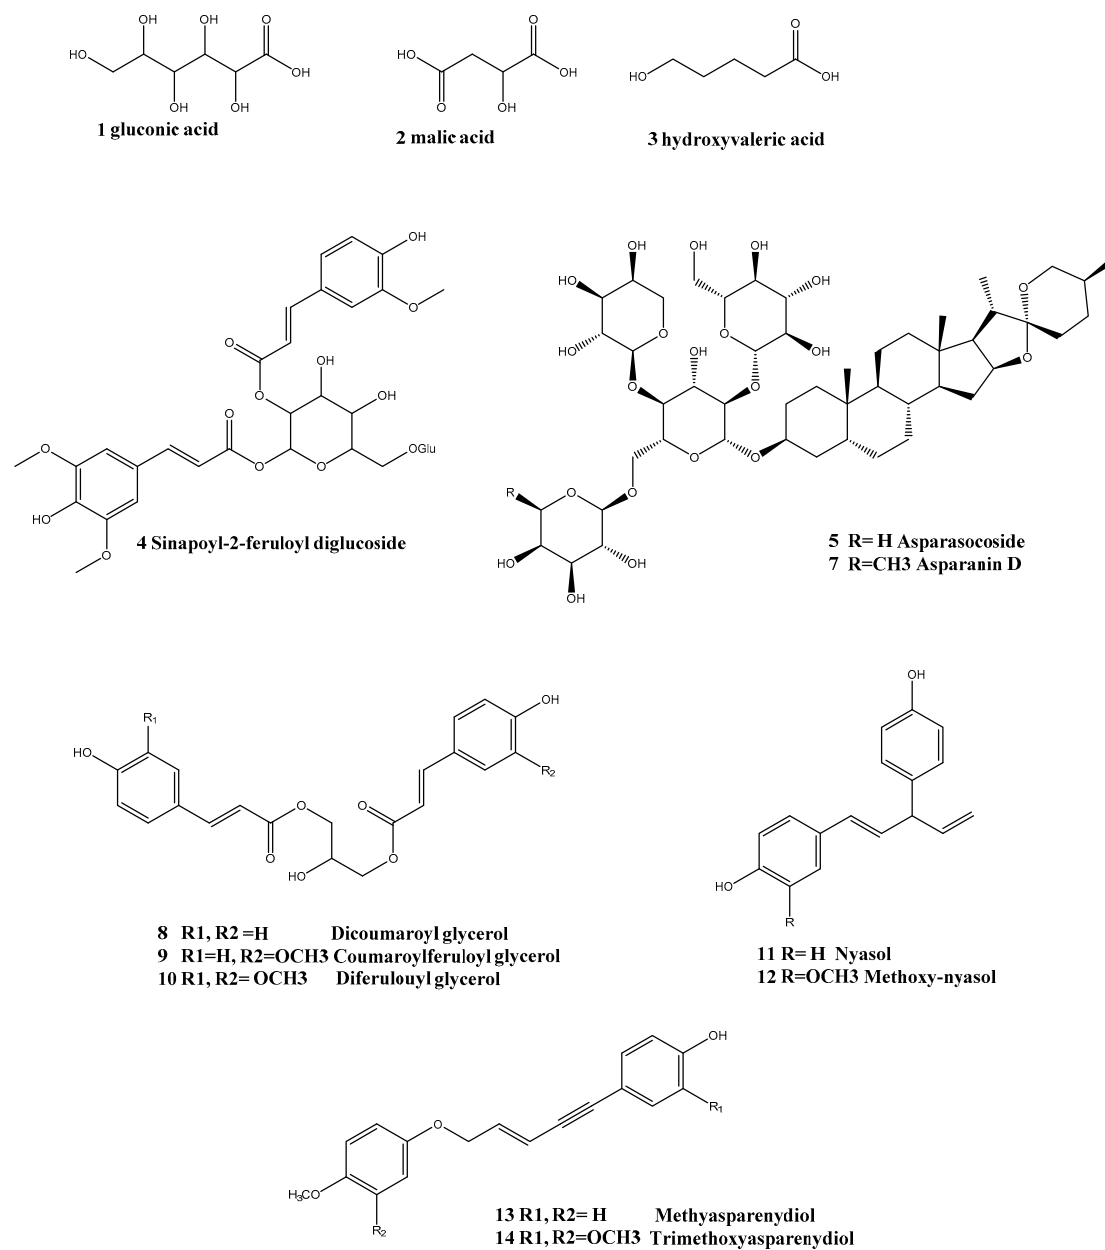

Structures are illustrated as a single positional isomer; however, it should be noted that positional isomers cannot be differentiated with the methodology used.

**Figure S2.** Structure of major constituents identified in the extract of green tea.

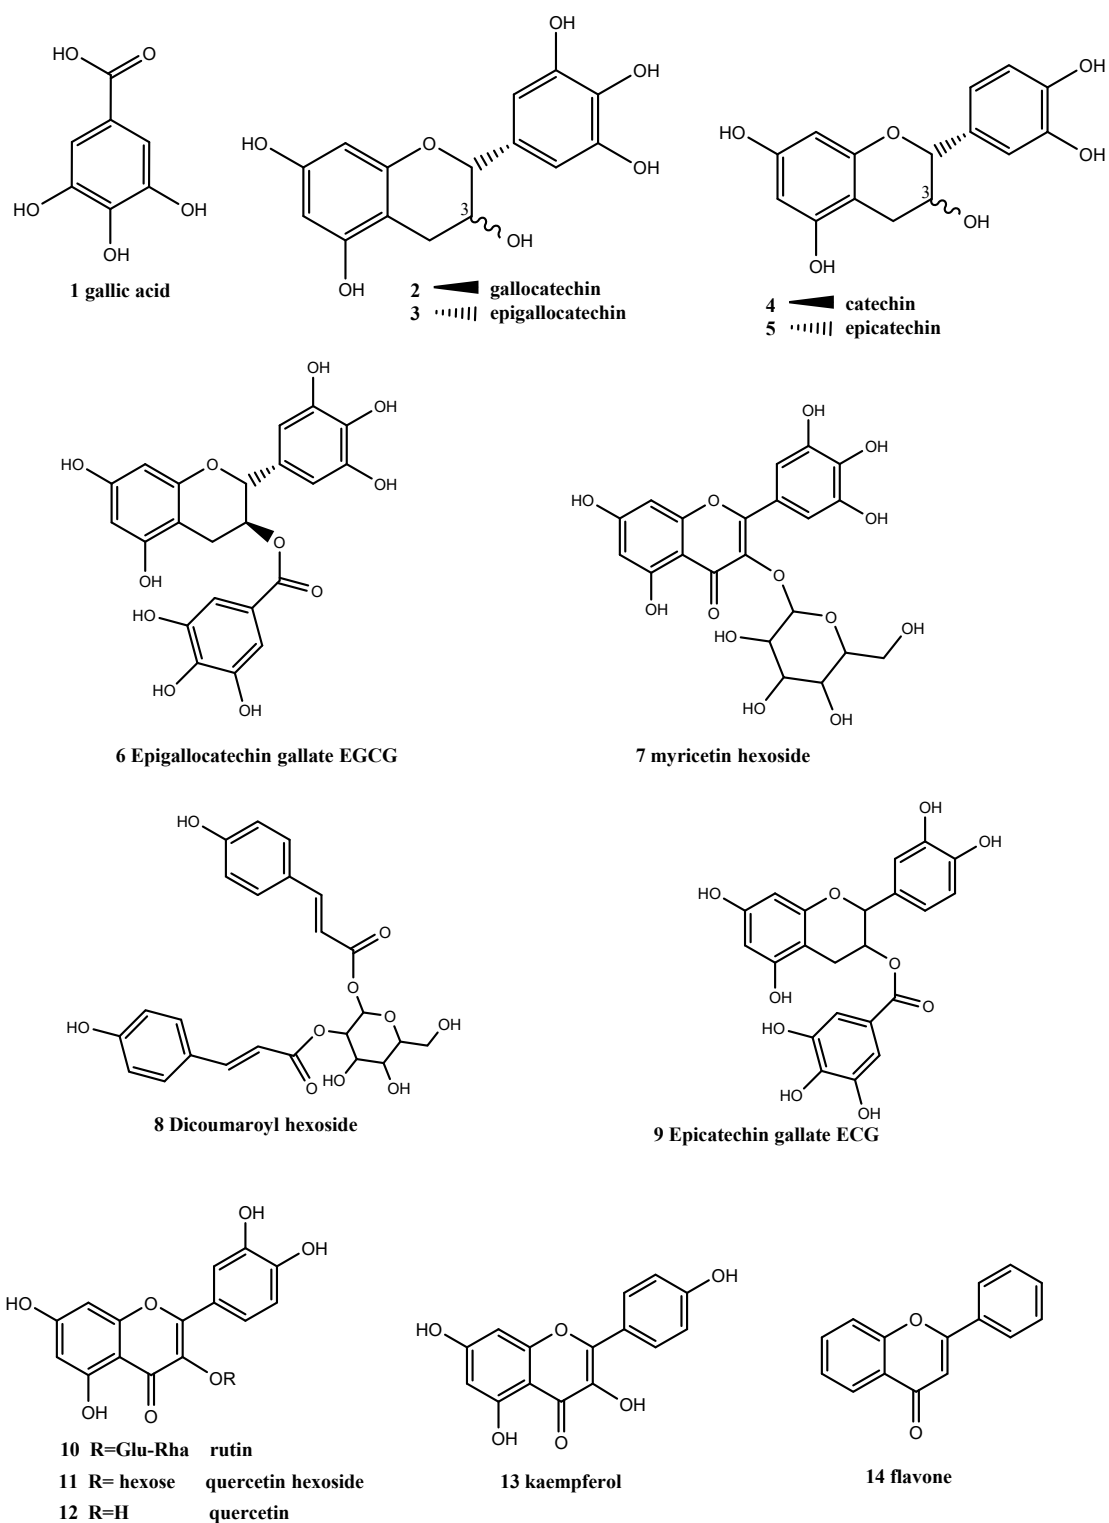

**Figure S3.** Structure of major constituents identified in the extract of rue.

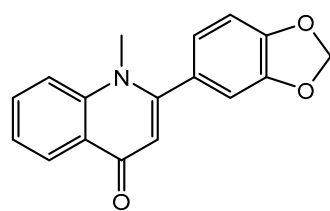

**1. graveoline**

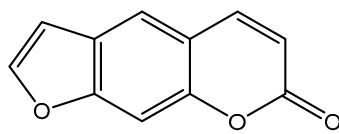

**2. psoralen**

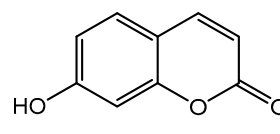

**3. umbelliferone**

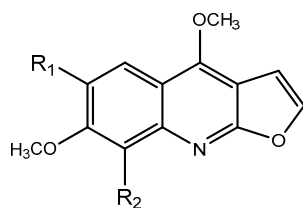

**4**  
R1=OCH<sub>3</sub>, R2=H skimmianine  
R1=H, R2=OCH<sub>3</sub> kokusaginin

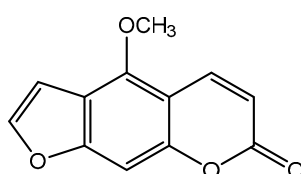

**5 bergapten**

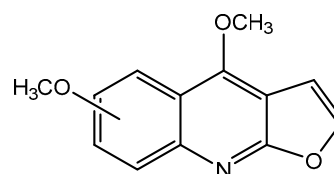

**6 dictamine**  
**7 methoxydictamine**

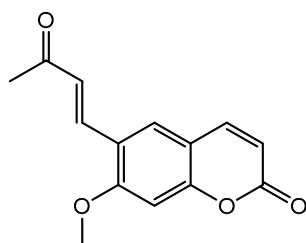

**8 suberenone**

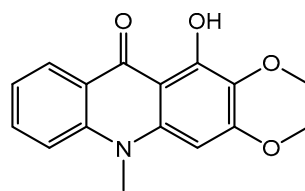

**9 arborinine**

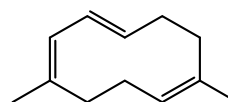

**10 pregeijerene**

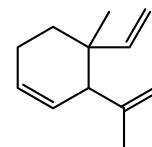

**10 geijerene**

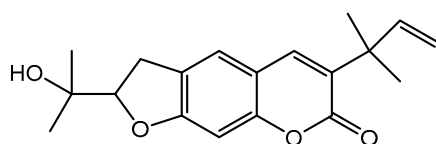

**11 chalepin**

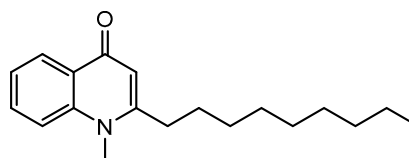

**12 N-methyl, 2-nonyl-quinoline-4-one**

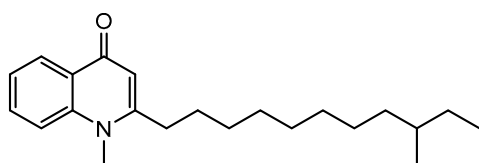

**13 N-methyl, 2-(9-methylundecyl)- quinoline-4-one**

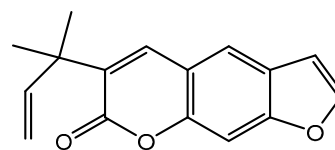

**14 chalepentin**

**Figure S4.** Cytotoxic effect of doxorubicin on pretreated and untreated HepG2 cells.

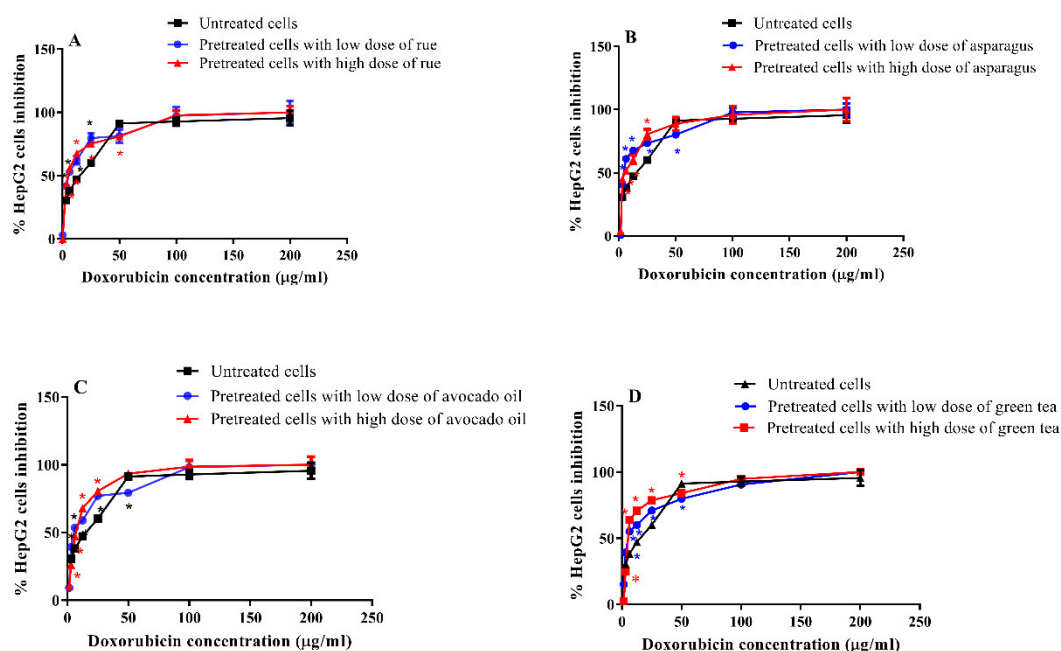

**Table S1.** Major metabolites identified in active plant extracts.

| Plant extract     | m/z    | Chemical formula                                             | Tentative identification           | Chemical class  | Reference                        |
|-------------------|--------|--------------------------------------------------------------|------------------------------------|-----------------|----------------------------------|
| Asparagus Extract | 195.2  | C <sub>6</sub> H <sub>11</sub> O <sub>7</sub> <sup>-</sup>   | 1. Gluconic acid                   | Organic acid    | Jiménez-Sánchez et al., 2016 (1) |
|                   | 133.1  | C <sub>4</sub> H <sub>5</sub> O <sub>5</sub> <sup>-</sup>    | 2. Malic acid                      | Organic acid    |                                  |
|                   | 179.2  | C <sub>9</sub> H <sub>8</sub> O <sub>3</sub> <sup>-</sup>    | 3. Caffeic acid                    | Phenolic acid   |                                  |
|                   | 723.4  | C <sub>33</sub> H <sub>39</sub> O <sub>18</sub> <sup>-</sup> | 4. Sinapoyl-2-feruloyl diglucoside | Phenolic acid   |                                  |
|                   | 1003.5 | C <sub>49</sub> H <sub>79</sub> O <sub>21</sub> <sup>-</sup> | 5. Asparacoside                    | Saponin         | Sharma et al., 1982 (3)          |
|                   | 1001.5 |                                                              | 6. Unknown                         | Saponin         | Zhang et al., 2004 (4)           |
|                   | 1017.5 | C <sub>50</sub> H <sub>81</sub> O <sub>21</sub> <sup>-</sup> | 7. Asparanin D                     | Saponin         |                                  |
|                   | 383.2  | C <sub>21</sub> H <sub>19</sub> O <sub>7</sub> <sup>-</sup>  | 8. Dicoumaroyl glycerol            | Phenolic acid   |                                  |
|                   | 413.2  | C <sub>22</sub> H <sub>21</sub> O <sub>8</sub> <sup>-</sup>  | 9. Coumaroylferuloyl glycerol      | Phenolic acid   | Jiménez-Sánchez et al., 2016 (1) |
|                   | 443.2  | C <sub>23</sub> H <sub>23</sub> O <sub>9</sub> <sup>-</sup>  | 10. Diferuloyl glycerol            | Phenolic acid   |                                  |
|                   | 251.1  | C <sub>17</sub> H <sub>15</sub> O <sub>2</sub> <sup>-</sup>  | 11. Nysaol                         | Norlignane      |                                  |
|                   | 281.1  | C <sub>18</sub> H <sub>17</sub> O <sub>3</sub>               | 12. Methoxynyasol                  | Nor lignan      | Zhang et al., 2004 (4)           |
|                   | 279.1  | C <sub>18</sub> H <sub>15</sub> O <sub>3</sub> <sup>-</sup>  | 13. Methyl asparenidiol            | Phenylacetylene |                                  |
|                   | 339.2  | C <sub>20</sub> H <sub>19</sub> O <sub>5</sub> <sup>-</sup>  | 14. Trimethoxy asparenidiol        | Phenylacetylene |                                  |
| Green tea Extract | 169    | C <sub>7</sub> H <sub>5</sub> O <sub>5</sub> <sup>-</sup>    | 1. Gallic acid                     | Phenolic acid   | Kim and Kim, 2019 (5)            |
|                   | 305.1  | C <sub>15</sub> H <sub>13</sub> O <sub>7</sub> <sup>-</sup>  | 2. Gallic acid                     | Flavonoid       | Savić et al., 2014 (2)           |
|                   | 305.1  | C <sub>15</sub> H <sub>13</sub> O <sub>7</sub> <sup>-</sup>  | 3. Epigallocatechin                | Flavonoid       |                                  |
|                   | 289.1  | C <sub>15</sub> H <sub>13</sub> O <sub>6</sub> <sup>-</sup>  | 4. Catechin                        | Flavonoid       | Stöggel et al., 2004 (6)         |
|                   | 289.1  | C <sub>15</sub> H <sub>13</sub> O <sub>6</sub> <sup>-</sup>  | 5. Epicatechin                     | Flavonoid       |                                  |
|                   | 457.1  | C <sub>22</sub> H <sub>17</sub> O <sub>11</sub> <sup>-</sup> | 6. Epigallocatechin-gallate        | Flavonoid       | Kim and Kim, 2019 (5)            |
|                   | 479.1  | C <sub>21</sub> H <sub>19</sub> O <sub>13</sub>              | 7. Myricetin hexoside              | Flavonoid       | Savić et al., 2014 (2)           |
|                   | 471.2  | C <sub>24</sub> H <sub>23</sub> O <sub>10</sub> <sup>-</sup> | 8. Dicoumaroyl hexose              | Phenolic acid   |                                  |
|                   | 441.1  | C <sub>22</sub> H <sub>17</sub> O <sub>10</sub> <sup>-</sup> | 9. Epicatechin gallate (ECG)       | Flavonoid       | Kim and Kim, 2019 (5)            |
|                   | 609.2  | C <sub>27</sub> H <sub>29</sub> O <sub>16</sub> <sup>-</sup> | 10. Rutin                          | Flavonoid       |                                  |
|                   | 463.1  | C <sub>21</sub> H <sub>19</sub> O <sub>12</sub> <sup>-</sup> | 11. Quercetin hexoside             | Flavonoid       |                                  |
|                   | 301.1  | C <sub>15</sub> H <sub>9</sub> O <sub>7</sub> <sup>-</sup>   | 12. Quercetin                      | Flavonoid       |                                  |
|                   | 285.1  | C <sub>15</sub> H <sub>9</sub> O <sub>7</sub> <sup>-</sup>   | 13. Kaempferol                     | Flavonoid       | Savić et al., 2014 (2)           |
|                   | 221.1  | C <sub>15</sub> H <sub>9</sub> O <sub>2</sub> <sup>-</sup>   | 14. Flavone                        | Flavonoid       |                                  |
| Rue Extract       | 280.1  | C <sub>17</sub> H <sub>14</sub> NO <sub>3</sub> <sup>+</sup> | 1. Graveoline                      | Alkaloid        | Ghosh et al., 2014 (7)           |

|       |                                                              |                                                      |          |                                          |
|-------|--------------------------------------------------------------|------------------------------------------------------|----------|------------------------------------------|
| 187.1 | C <sub>11</sub> H <sub>7</sub> O <sub>3</sub> <sup>+</sup>   | 2. Psoralen                                          | Coumarin | Zobel and Brown, 1988 (8)                |
| 163.1 | C <sub>9</sub> H <sub>7</sub> O <sub>3</sub> <sup>+</sup>    | 3. Umbelliferone                                     | Coumarin | Malik et al., 2016 (9)                   |
| 259   | C <sub>14</sub> H <sub>14</sub> NO <sub>4</sub> <sup>+</sup> | 4.kokusaginin/skimmianine                            | Alkaloid | Mancuso et al., 2015 (10)                |
| 217   | C <sub>12</sub> H <sub>9</sub> O <sub>4</sub> <sup>+</sup>   | 5.Bergapten                                          | Coumarin | Zobel and Brown, 1988 (8)                |
| 200.1 | C <sub>12</sub> H <sub>10</sub> NO <sub>2</sub> <sup>+</sup> | 6. Dictamine                                         | Alkaloid | Kostova et al., 1999 (11)                |
| 230   | C <sub>13</sub> H <sub>12</sub> NO <sub>3</sub>              | 7. Methoxydictamine                                  | Alkaloid |                                          |
| 245.1 | C <sub>14</sub> H <sub>13</sub> O <sub>4</sub>               | 8. Suberenone                                        | Coumarin | Malik et al., 2016 (9)                   |
| 286.2 | C <sub>16</sub> H <sub>16</sub> NO <sub>4</sub>              | 9. Arborinine                                        | Alkaloid | Réthy et al., 2007 (12)                  |
| 163.1 | C <sub>12</sub> H <sub>19</sub> O <sub>3</sub>               | 10. Pregeijerene/ Geijerene                          | Terpene  | França Orlanda and Nascimento, 2015 (13) |
| 315.2 | C <sub>19</sub> H <sub>23</sub> O <sub>4</sub>               | 11.Chalepin                                          | Coumarin | Sampaio et al., 2018 (14)                |
| 286.2 | C <sub>19</sub> H <sub>28</sub> NO                           | 12. N-Methyl, 2-nonyl-quinoline-4-one                | Alkaloid |                                          |
| 328.3 | C <sub>22</sub> H <sub>34</sub> NO                           | 13.Methyl, 2-(9-methylundecyl)- quino-<br>line-4-one | Alkaloid | Oh et al., 2014 (15)                     |
| 255.1 | C <sub>16</sub> H <sub>15</sub> O <sub>3</sub>               | 14. Chalepentin                                      | Coumarin | Malik et al., 2016 (9)                   |
| 338.4 | ND                                                           | 15. ND                                               | Alkaloid |                                          |
| 368.3 | ND                                                           | 16. ND                                               | Alkaloid |                                          |

**Table S2.** Fatty acid composition of avocado oil.

| Fatty acid              |                      | Percentage of FAME |
|-------------------------|----------------------|--------------------|
| Palmitic acid           | (C <sub>16</sub> )   | 16%                |
| Palmitoleic acid        | (C <sub>16:1</sub> ) | 5.20%              |
| Stearic acid            | (C <sub>18</sub> )   | 0.82%              |
| Oleic acid              | (C <sub>18:1</sub> ) | <b>53.40%</b>      |
| Trans oleic acid        | (C <sub>18:1</sub> ) | 6.20%              |
| Linoleic acid           | (C <sub>18:2</sub> ) | 17.20%             |
| Linolenic acid          | (C <sub>18:3</sub> ) | 1.14%              |
| Identified fatty acid   |                      | 99.96%             |
| Saturated fatty acids   |                      | 16.82%             |
| Unsaturated fatty acids |                      | 83.14%             |

## References

- Jiménez-Sánchez C, Lozano-Sánchez J, Rodríguez-Pérez C, Segura-Carretero A, Fernández-Gutiérrez A: Comprehensive, untargeted, and qualitative RP-HPLC-ESI-QTOF/MS2 metabolite profiling of green asparagus (*Asparagus officinalis*). *J Food Compos Anal* **46**, 78-87, 2016. doi: 10.1016/j.jfca.2015.11.004
- Savić IM, Nikolić VD, Savić IM, Nikolić LB, Jović MD, et al.: The qualitative analysis of the green tea extract using ESI-MS method. *Savrem Tehnol* **3**, 30-37, 2014. doi: 10.5937/savteh1401030s
- Sharma SC, Chand R, Bhatti BS, Sati OP: New oligospirostanosides and oligofurostanosides from *Asparagus adscendens* roots. *Planta Med* **46**, 48-51, 1982. doi: 10.1055/s-2007-970018
- Zhang HJ, Sydara K, Tan GT, Ma C, Southavong B, et al.: Bioactive constituents from *Asparagus cochinchinensis*. *J Nat Prod* **67**, 194-200, 2004. doi: 10.1021/np030370b
- Kim Y, Kim MK: *Effects of different harvesting times and oxidative fermentation methods on phytochemicals, flavors, and sensory properties of Korean teas*. In: Chemistry of Korean Foods and Beverages pp. 77-95. ACS Symposium Series, 2019.
- Stöggli WM, Huck CW, Bonn GK: Structural elucidation of catechin and epicatechin in sorrel leaf extracts using liquid-chromatography coupled to diode array-, fluorescence-, and mass spectrometric detection. *J Sep Sci* **27**, 524-528, 2004. doi: 10.1002/jssc.200301694
- Ghosh S, Bishayee K, Khuda-Buksh AR: Graveoline isolated from ethanolic extract of *Ruta graveolens* triggers apoptosis and autophagy in skin melanoma cells: a novel apoptosis-independent autophagic signaling pathway. *Phytother Res* **28**, 1153-1162, 2014. doi: 10.1002/ptr.5107
- Zobel AM, Brown SA: Determination of furanocoumarins on the leaf surface of *Ruta graveolens* with an improved extraction technique. *J Nat Prod* **51**, 941-946, 1988. doi: 10.1021/np50059a021
- Malik S, Moraes DFC, do Amaral FMM, Ribeiro MNS: *Ruta graveolens*: *Phytochemistry, Pharmacology, and Biotechnology*. In: Transgenesis and Secondary Metabolism pp. 1-28. Springer International Publishing: Cham, 2016.
- Mancuso G, Borghonovo G, Scaglioni L, Bassoli A: Phytochemicals from *Ruta graveolens* activate TAS2R bitter taste receptors and TRP channels involved in gustation and nociception. *Molecules* **20**, 18907-18922, 2015. doi: 10.3390/molecules201018907
- Kostova I, Ivanova A, Mikhova B, Klaiher I: Alkaloids and coumarins from *Ruta graveolens*. *Monatshfte Fur Chemie* **130**, 703-707, 1999. doi: 10.1007/PL00010251
- Réthy B, Zupkó I, Minorics R, Hohmann J, Ocsosvzki I, et al.: Investigation of cytotoxic activity on human cancer cell lines of arborinine and furanocoumarins isolated from *Ruta graveolens*. *Planta Med* **73**, 41-48, 2007. doi: 10.1055/s-2006-951747
- França Orlanda JF, Nascimento AR: Chemical composition and antibacterial activity of *Ruta graveolens* L. (Rutaceae) volatile oils, from São Luís, Maranhão, Brazil. *S Afr J Bot* **99**, 103-106, 2015. doi: 10.1016/j.sajb.2015.03.198

- 14 Sampaio OM, Vieira LCC, Belleto BS, King-Diaz B, Lotina-Hennsen B, et al.: Evaluation of alkaloids isolated from *Ruta graveolens* as photosynthesis inhibitors. *Molecules* **23**, 2693, 2018. doi: 10.3390/molecules23102693
- 15 Oh ET, Lee JH, Kim CS, Keum YS: Alkylquinolone alkaloid profiles in *Ruta graveolens*. *Biochem Syst Ecol* **57**, 384–387, 2014. doi: 10.1016/j.bse.2014.09.011
